# Supplementary material
Source: PubMed Central journal article supplement (PMC7479962)
Supplement: advancesADV2020001879-suppl1.pdf [file advancesADV2020001879-suppl1.pdf]

## Anti-tumor activity of the dual BET and CBP/EP300 inhibitor NEO2734

Filippo Spriano <sup>1</sup>, Eugenio Gaudio <sup>1</sup>, Luciano Cascione <sup>1,2</sup>, Chiara Tarantelli <sup>1</sup>, Federica Melle <sup>3</sup>, Giovanna Motta <sup>3</sup>, Valdemar Priebe <sup>1</sup>, Andrea Rinaldi <sup>1</sup>, Gaetanina Golino <sup>1</sup>, Afua Adjeiwaa Mensah <sup>1</sup>, Luca Aresu <sup>4</sup>, Emanuele Zucca <sup>1,5</sup>, Stefano Pileri <sup>3</sup>, Michael Witcher <sup>6</sup>, Bill Brown <sup>7</sup>, Claes Wahlestedt <sup>8</sup>, Francis Giles <sup>9</sup>, Anastasios Stathis <sup>5,10</sup>, Francesco Bertoni <sup>1,5</sup>

<sup>1</sup> Institute of Oncology Research, Faculty of Biomedical Sciences, USI, Bellinzona, Switzerland; <sup>2</sup> SIB Swiss Institute of Bioinformatics, Lausanne, Switzerland; <sup>3</sup> European Institute of Oncology, Division of Diagnostic Haematopathology, Milan, Italy; <sup>4</sup> Department of Veterinary Science, University of Turin, Grugliasco, Turin, Italy; <sup>5</sup> Oncology Institute of Southern Switzerland (IOSI), Bellinzona, Switzerland; <sup>6</sup> Departments of Oncology and Experimental Medicine, McGill University, Montreal, Canada; <sup>7</sup> Oncology, NEOMED Therapeutics 1 Inc, Montreal, Canada; <sup>8</sup> Center for Therapeutic Innovation, University of Miami Miller School of Medicine, Miami, FL, USA; <sup>9</sup> Developmental Therapeutics Consortium, Chicago, IL, USA; <sup>10</sup> Faculty of Biomedical Sciences, USI, Lugano, Switzerland.

### Supplementary Material

**Supplementary Figure 1. Curves showing binding of molibresib and NEO2734 to bromodomains.** Bromodomain levels measured by qPCR (Signal; y-axis) are plotted against the corresponding compound concentration in nM in log<sub>10</sub> scale (x-axis). Experiments performed in duplicate. BRD2, BRD3, BRD4, BRDT, CBP AND EP300 shown as examples.

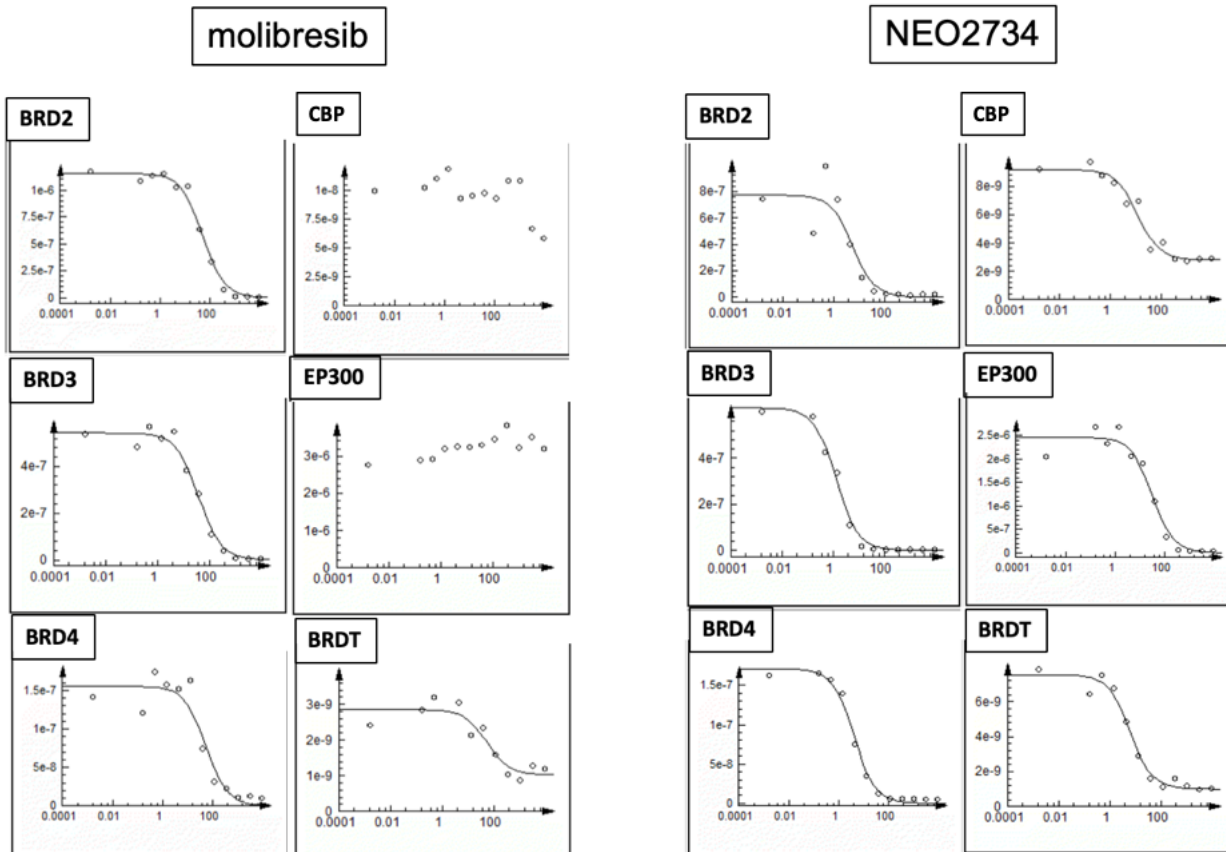

**Supplementary Figure 2. Activity of NEO2734 in Lymphoma or Leukemia or Prostate cancer cells compared to other tumor types.** IC50s calculated for 60 cell lines after 72 hours treatment with NEO2734. Each dot represents a cell line. \*\*\*  $p < 0.001$  (Mann-Whitney test)

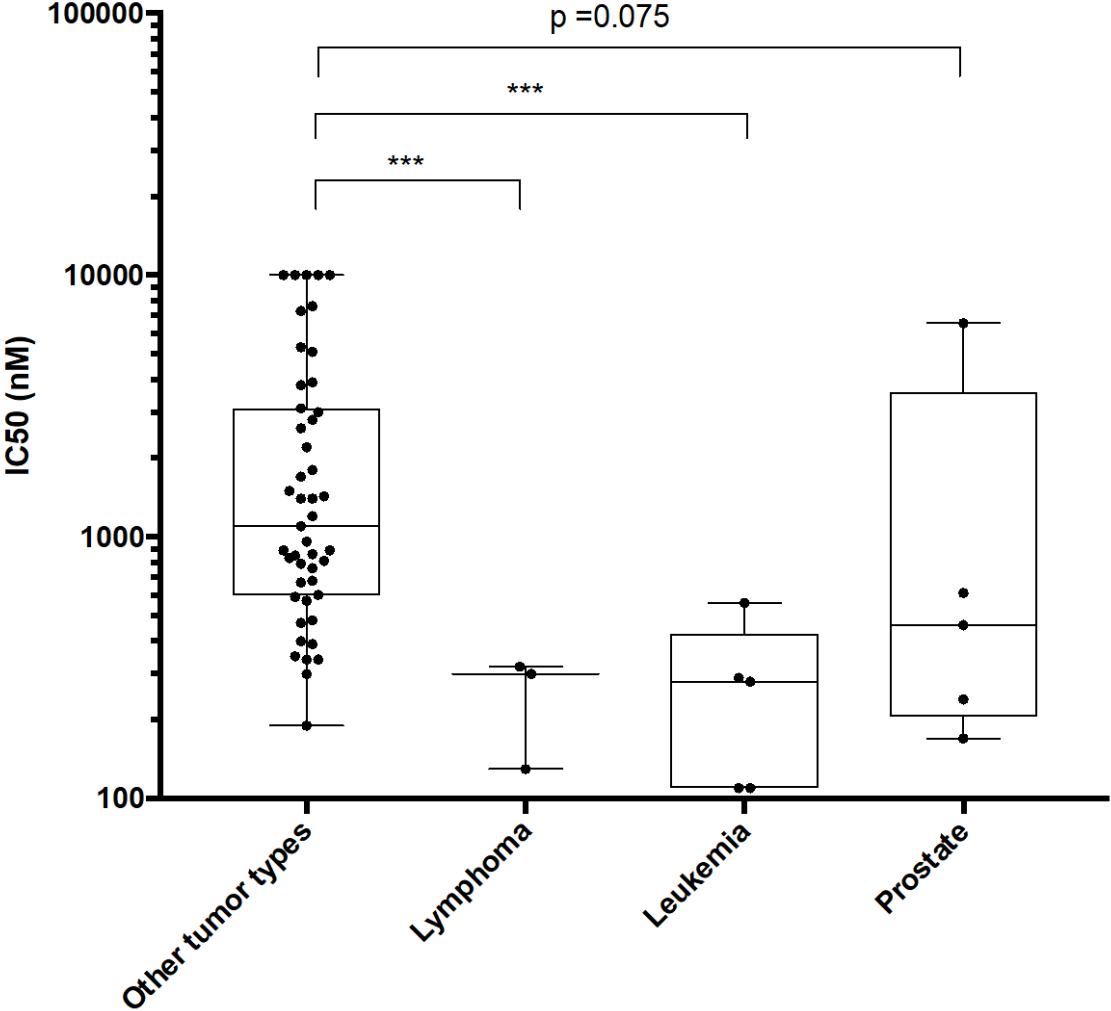

**Supplementary Figure 3. Percentage of cell lines for each tumor type that are sensitive or resistant to NEO2734.** Sensitive = IC50 < 500 nM; Resistant = IC50 > 500 nM. The numbers inside the bars represent the number of cell lines in each group. X axis: percentage of cell lines that are sensitive or resistant for each tumor type.

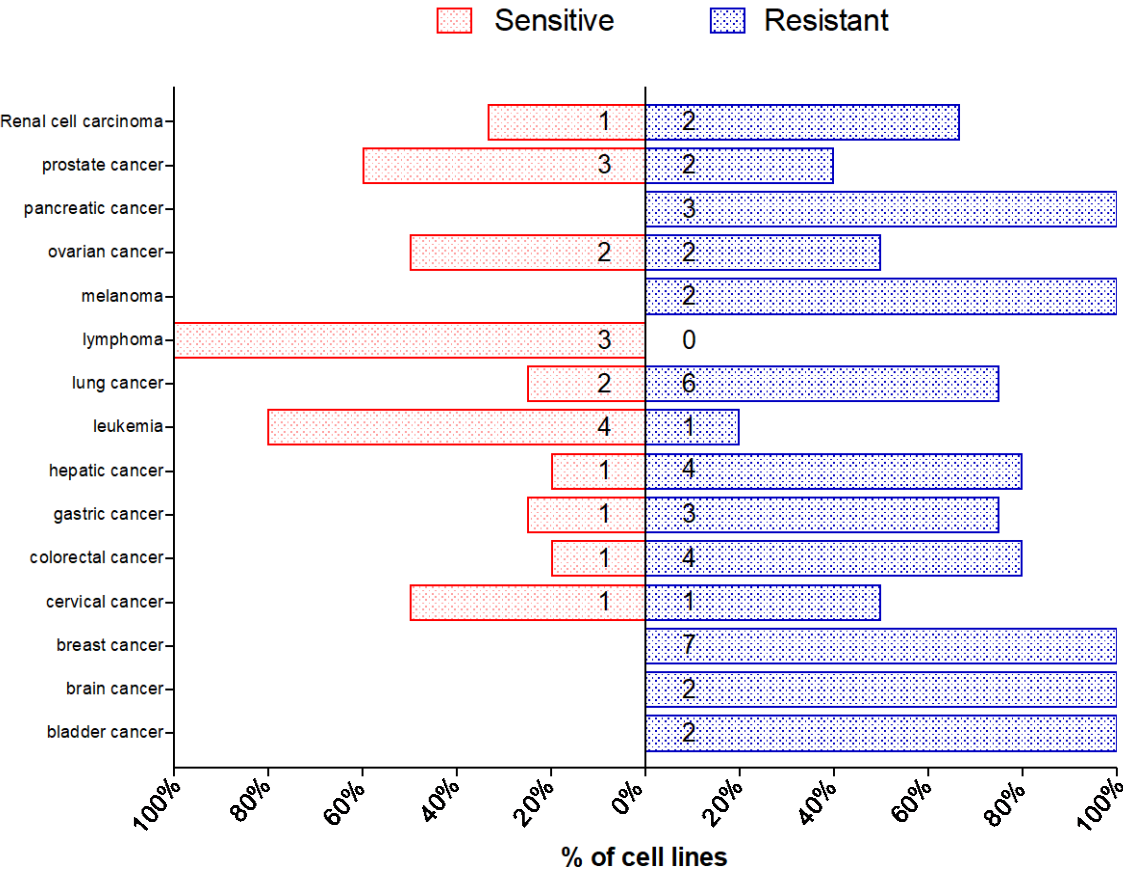

**Supplementary Figure 4. *BCL2* is upregulated in DLBCL cell lines resistant to NEO2734.** A) Heatmap generated with the GSEA software (Broad Institute) showing the top 50 upregulated genes in sensitive cell lines (left panel) and the top 50 upregulated genes in resistant cell lines (right panel). B) Box-plot showing CI (Chou-Talalay combination index) for NEO2734 plus venetoclax combination treatment. Y-axis: CI values. In each box-plot, the line in the middle of the box represents the median and the box extends from the 25th to the 75th percentile (interquartile range, IQ); the whiskers extend to the upper and lower adjacent values (i.e.,  $\pm 1.5$  IQ).  $CI < 0.9 =$  synergy;  $0.9 < CI < 1.1 =$  additivity;  $CI > 1.1 =$  no benefit. C) Dose response curve after 72h treatment with venetoclax alone. D) Dose response curves for NEO2734 plus a fixed concentration of venetoclax and vice versa. In SU-DHL10 and TMD8 sensitive cell lines the combination curves are below the predicted additivity curves, indicating synergism. In Farage and U2932 resistant cell lines the combination and predicted additivity curves overlap, indicating no synergism.

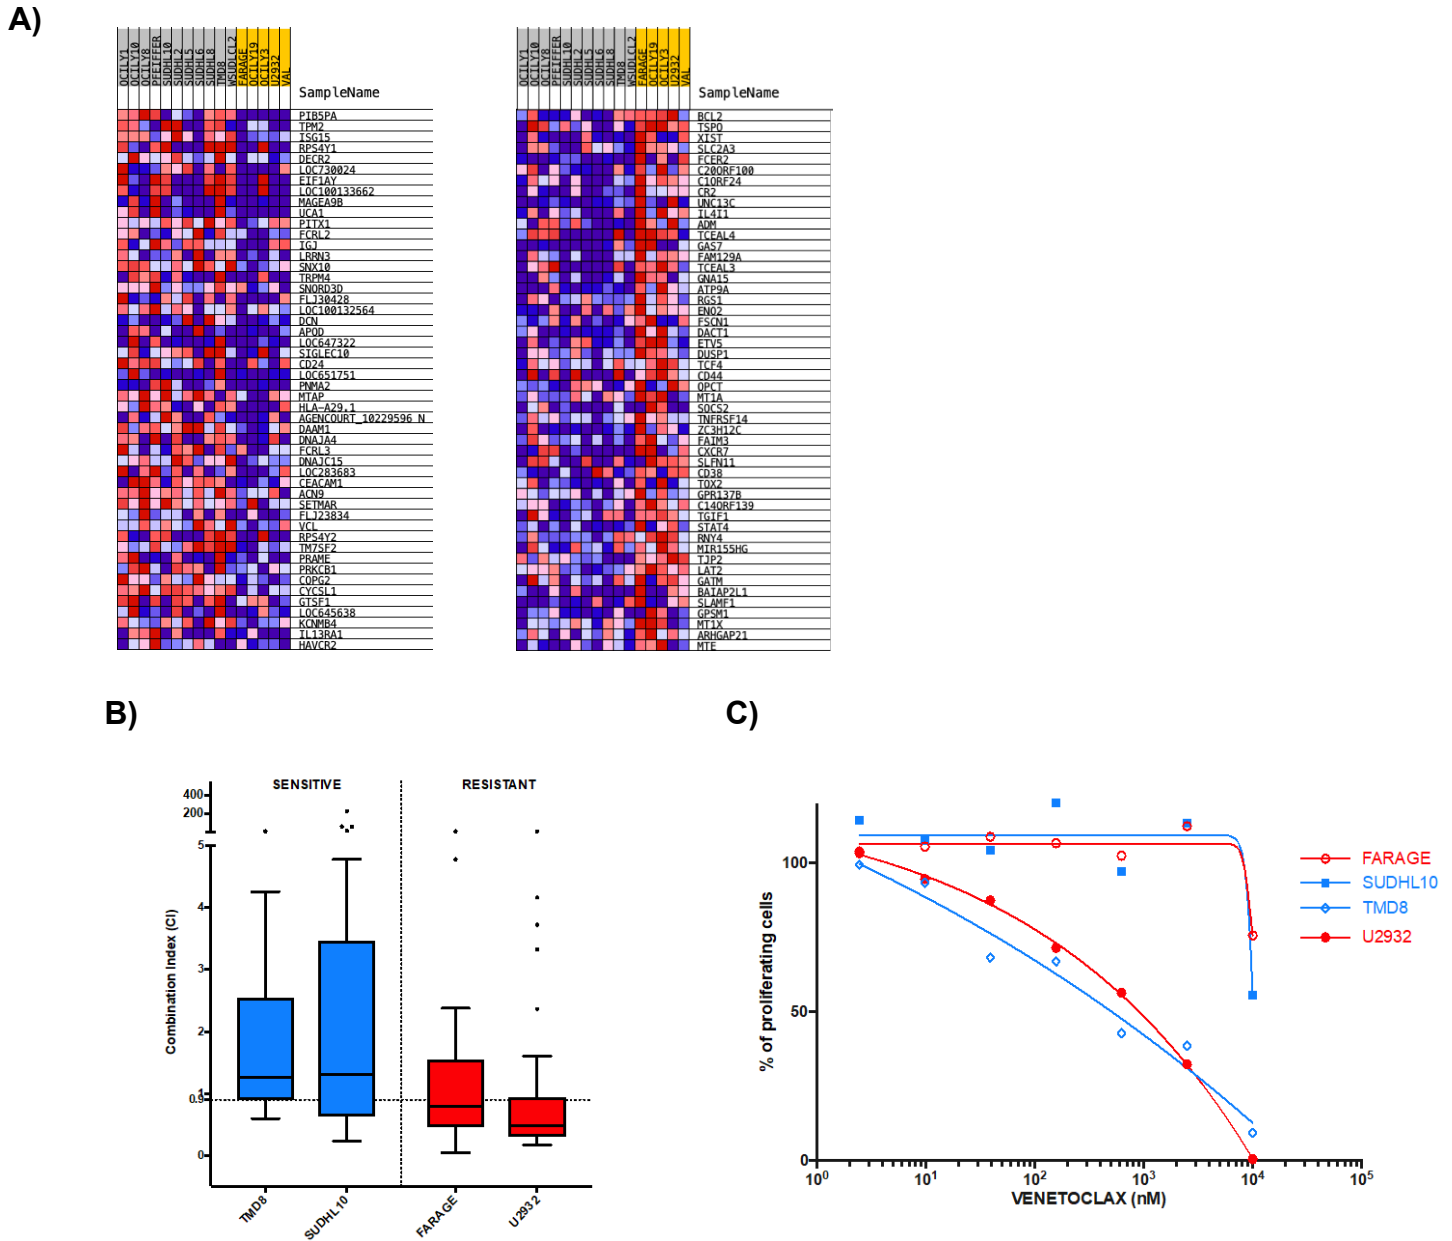

D)

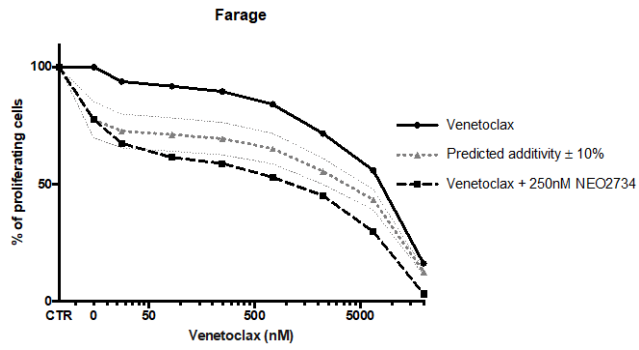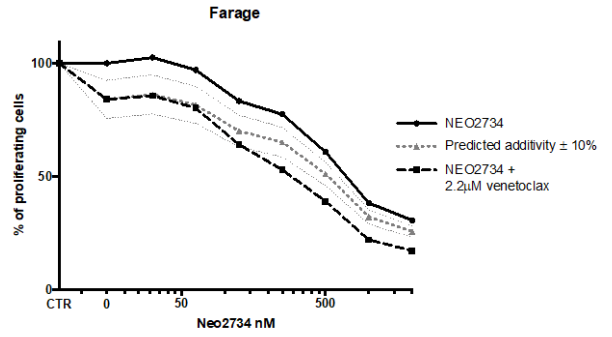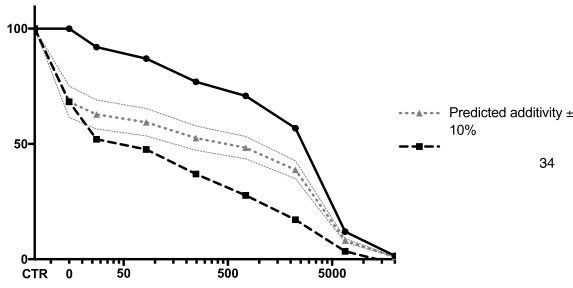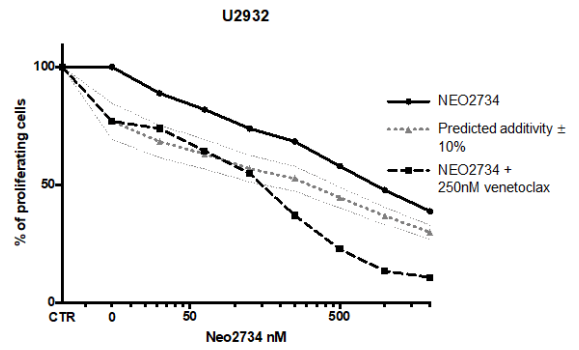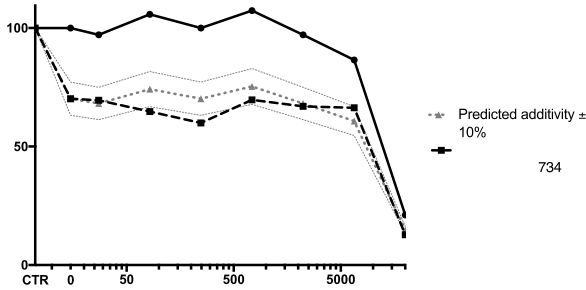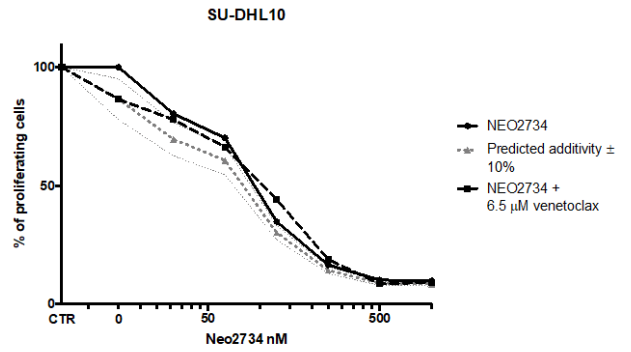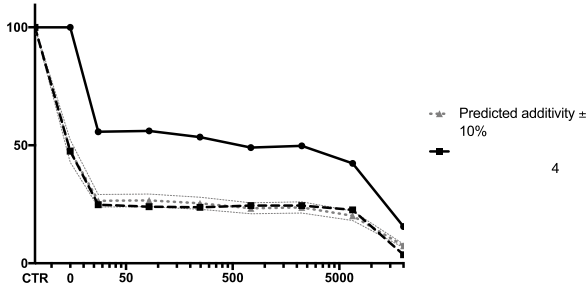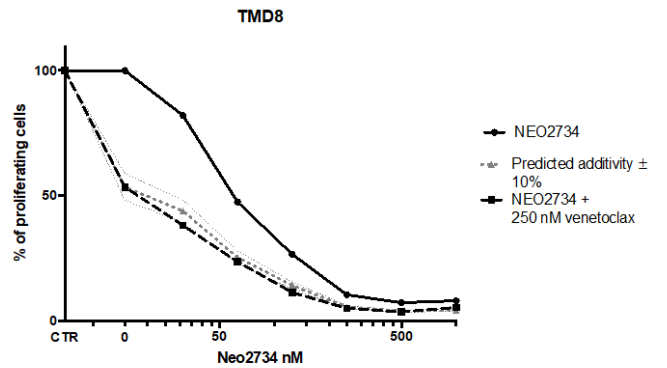

**Supplementary Figure 5. NEO2734, NEO1132, birabresib (OTX015) and SGC-CBP30 show correlated patterns of activity in 27 DLBCL cell lines.** Each dot represents a cell line. Pearson's correlation was used for correlation analysis.

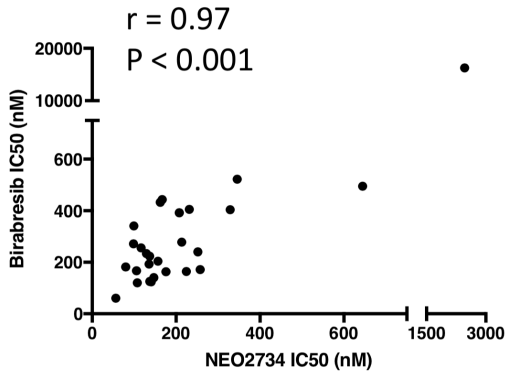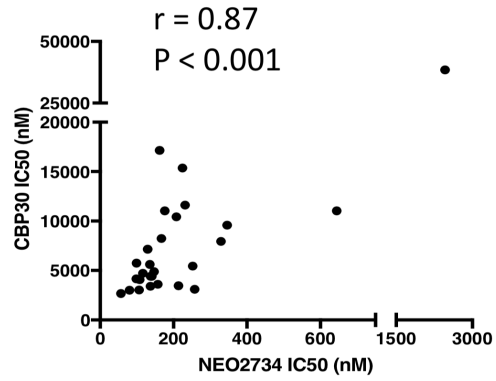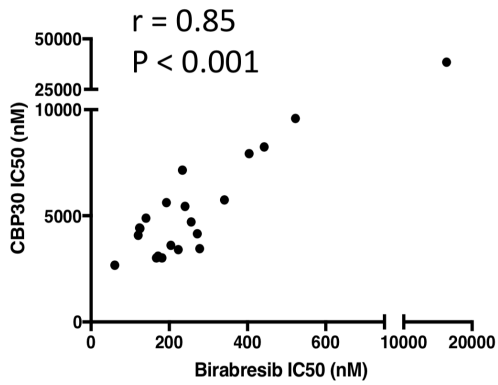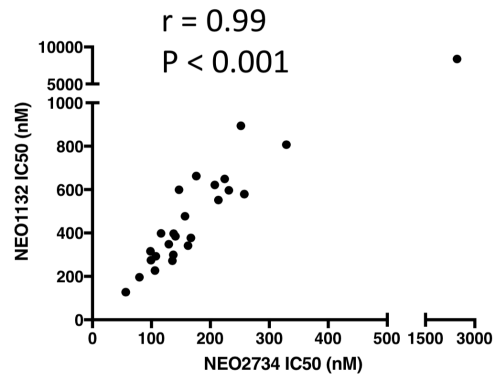

**Supplementary Figure 6. Effect of three days versus six days exposure to NEO2734 and birabresib.** A) Box plot comparing AUC Birabresib / AUC NEO2734 after 3 days or 6 days treatment in CREBBP/EP300 WT or mutated DLBCL cell lines. B) Box plot comparing AUC birabresib/AUC NEO2734 after 3 days or 6 days treatment in *BCL2* low expressor or *BCL2* high expressor DLBCL cell lines. AUC (Area Under the Curve) was calculated using Prism7.

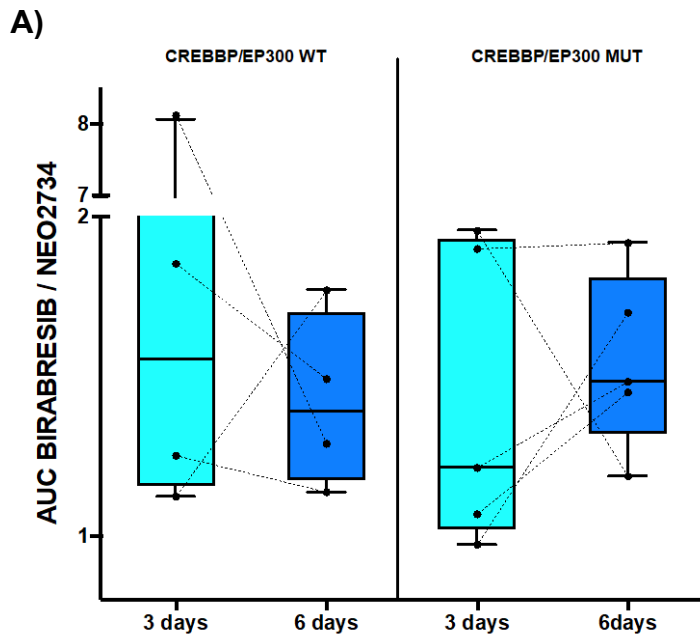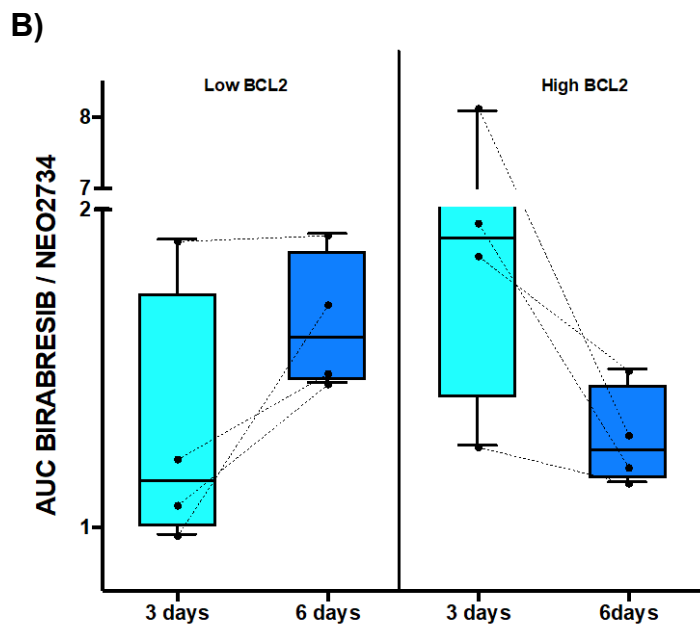

**Supplementary Figure 7. RNA-Seq of DLBCL cell lines treated with NEO2734 or birabresib in four DLBCL cell lines.** (A) volcano plots showing significantly upregulated (red) or down-regulated (blue) genes after exposure to NEO2734 (left panel) or birabresib (right panel). (B) Scatter plots of log<sub>2</sub>-fold gene-expression changes after NEO2734 and birabresib 6h treatment in four DLBCL cell lines. Y axis, log<sub>2</sub>-fold changes after birabresib treatment; X axis, log<sub>2</sub>-fold changes after NEO2734 treatment. Pearson rho = 0.89, P < 0.001. (C) GSEA plots for NEO2734-treated GCB-DLBCL analyzed for enrichment of genes affected by birabresib treatment (log<sub>2</sub>FC > |0.5|; adj. P < 0.05) in GCB-DLBCL (above) and GSEA plots in birabresib-treated GCB-DLBCL analyzed for enrichment of genes affected by NEO2734 in GCB-DLBCL (below). Green line, enrichment score; bars in the middle portion of the plots show where the members of the gene set appear in the ranked list of genes; Positive or negative ranking metric indicates, respectively, correlation or inverse correlation with the profile; NES, normalized enrichment score.

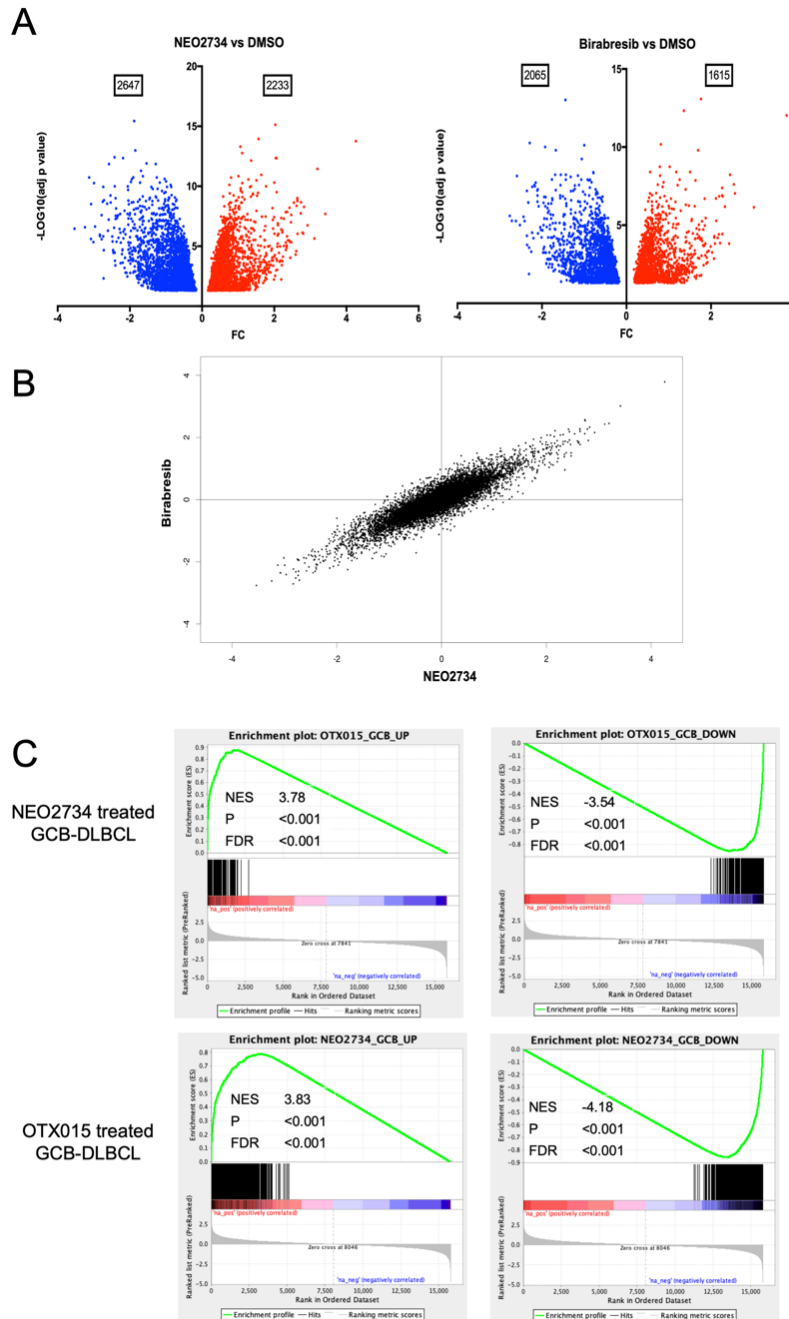



**Supplementary Figure 8. Real-time PCR performed after 6h NEO2734 treatment of DLBCL cell lines.** Real-time PCR was performed in 4 cell lines SU-DHL10 and TMD8 (sensitive) and U2932 and Farage (resistant) treated for 6h with 100 nM NEO2734 or DMSO. At least two biological replicates were performed. Primers: ASB2 Fw: 5'- CATTGGGCAGGAGGAGTACA-3', Rev: 5'- TCTCAGGAGGTGCAGTGGGA-3'; CD180 Fw: 5'- AACATCGCTTAATGGGCC -3' Rev: 5'- TGGGAAGTCTTTGGGGA ACT -3'; CDK9 Fw: 5'- GTTCCCCATTACAGCCTTGC -3' Rev: 5'- CAGACAGCGTGA ACTTGACC -3'; USP18 Fw: 5'- CTGACAATCCACCTCATGCG -3' Rev: 5'-AAAGCTCATACTGCCCTCCA -3'; CNT1 Fw5'- TTGTTTCGAGCAAGCAAGGAC -3'Rev: 5'- ATACTCCCACCAGTGCTTCC -3'; Primer sequences for BCL2, MYC, HIST2H2BE and HEXIM1 were obtained from Lucile et al.<sup>1</sup>

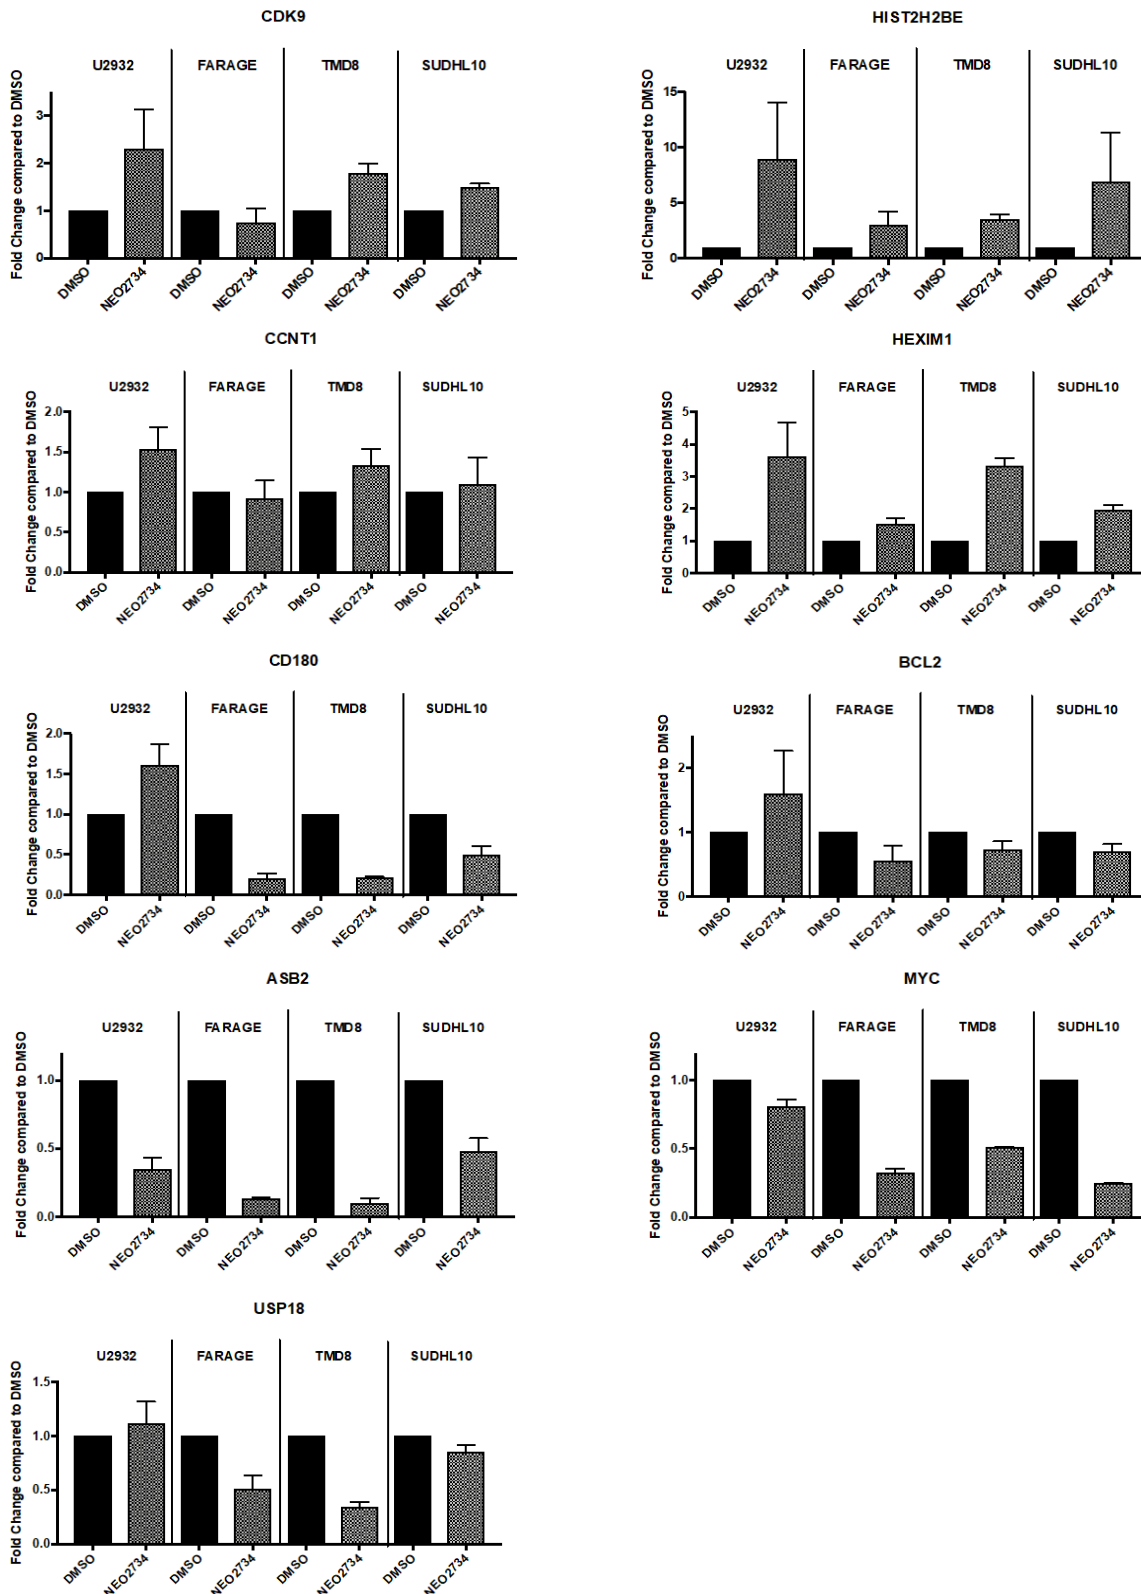

**Supplementary Figure 9. Antiproliferative activity of NEO2734, NEO1132, birabresib (OTX015) and CBP30 in a canine DLBCL cell line.** CLBL-1 cells were treated with increasing doses of NEO2734, NEO1132, Birabresib or CBP30 for 72h and the percentage of proliferating cells was determined with an MTT assay.

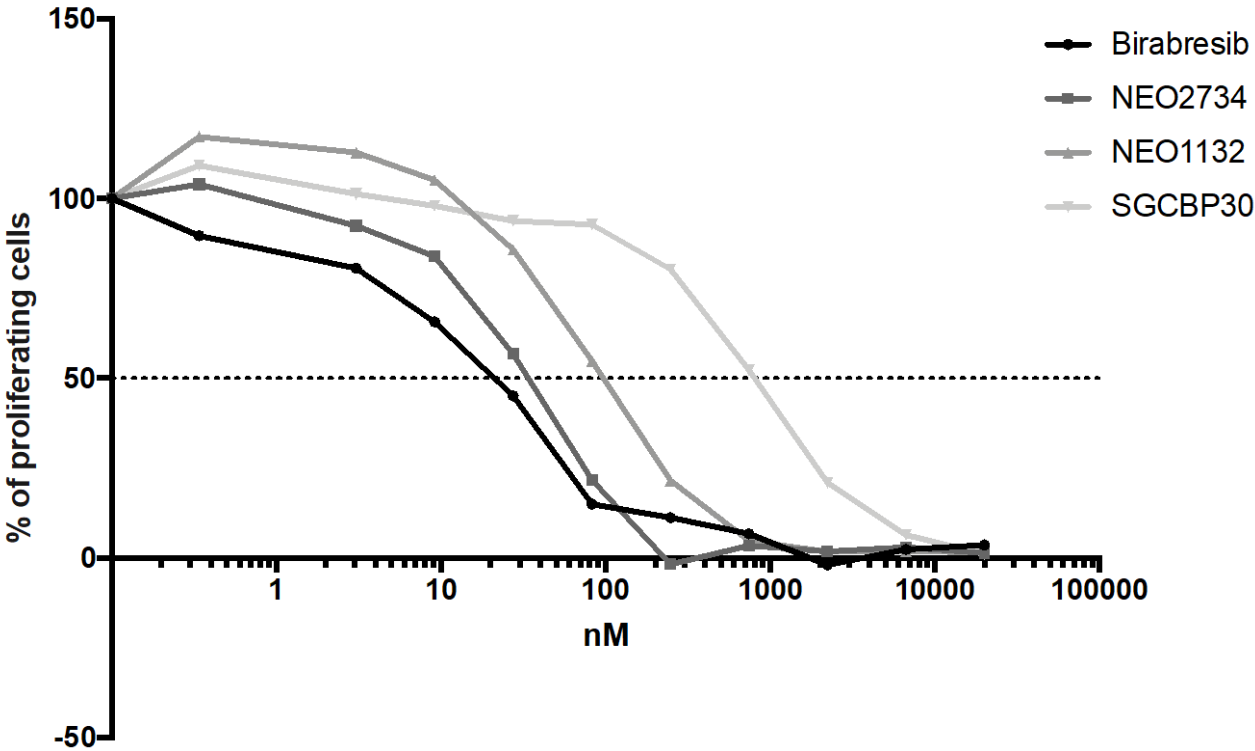

## SUPPLEMENTARY TABLES AND FIGURE

**Supplementary Table 1. Binding activity of NEO1132 against bromodomains, as detected using a ligand binding site-directed competition assay.**

| Target                       | NEO2734 (Kd, nM) | Molibresib (Kd, nM) | NEO1132 (Kd, nM) |
|------------------------------|------------------|---------------------|------------------|
| ATAD2A                       | >10000           | >10000              | >10000           |
| ATAD2B                       | >10000           | >10000              | 5600             |
| BAZ2A                        | 150              | >10000              | 120              |
| BAZ2B                        | 130              | >10000              | 150              |
| BRD1                         | 1100             | >10000              | 1200             |
| BRD2(1)                      | 4.6              | 55                  | 6.2              |
| BRD2(1,2)                    | 9                | 64                  | 42               |
| BRD2(2)                      | 4.1              | 20                  | 57               |
| BRD3(1)                      | 1.4              | 29                  | 4                |
| BRD3(1,2)                    | 3.5              | 40                  | 26               |
| BRD3(2)                      | 2.6              | 26                  | 48               |
| BRD4(1)                      | 5.1              | 60                  | 7.2              |
| BRD4(1,2)                    | 7.1              | 31                  | 63               |
| BRD4(2)                      | 6.2              | 19                  | 190              |
| BRD4(full-length,short-iso.) | 2.5              | 40                  | 7.4              |
| BRD7                         | 200              | >10000              | 110              |
| BRD8(1)                      | >10000           | >10000              | 4700             |
| BRD8(2)                      | >10000           | >10000              | >10000           |
| BRD9                         | 59               | >10000              | 43               |
| BRDT(1)                      | 4.6              | 150                 | 24               |
| BRDT(1,2)                    | 3.5              | 50                  | 87               |
| BRDT(2)                      | 17               | 37                  | 190              |
| BRPF1                        | 75               | >10000              | 6.5              |
| BRPF3                        | 2600             | >10000              | 1900             |
| CECR2                        | 25               | >10000              | 290              |
| CBP                          | 19               | >10000              | 61               |
| EP300                        | 31               | >10000              | 80               |
| FALZ                         | 2300             | >10000              | 140              |
| GCN5L2                       | >10000           | >10000              | >10000           |
| PBRM1(2)                     | 3800             | >10000              | 2400             |
| PBRM1(5)                     | 1100             | >10000              | 1500             |
| PCAF                         | 3300             | >10000              | 5300             |
| SMARCA2                      | 4700             | >10000              | 3700             |
| SMARCA4                      | 9100             | >10000              | 8300             |
| TAF1(2)                      | 100              | >10000              | 1300             |
| TAF1L(2)                     | 490              | >10000              | 7600             |
| TRIM24(Bromo.)               | 680              | >10000              | 410              |
| TRIM24(PHD,Bromo.)           | 2000             | >10000              | 890              |
| TRIM33(PHD,Bromo.)           | 3300             | >10000              | 1900             |
| WDR9(2)                      | 4100             | >10000              | 2400             |

**Supplementary Table 2. Antiproliferative activity, expressed in nM, obtained in 60 cell lines after 72 hours exposure to NEO2734 or molibresib (iBET-762, GSK525762).**

|    |                |           | Molibresib IC50 nM | NEO2734 IC50 nM |
|----|----------------|-----------|--------------------|-----------------|
| 1  | Bladder        | SW780     | 10000              | 1090            |
| 2  |                | T24       | 7230               | 590             |
| 3  | Brain & Nerves | M059K     | 10000              | 1430            |
| 4  |                | SK-N-SH   | 10000              | 1530            |
| 5  | Breast         | BT474     | 10000              | 1710            |
| 6  |                | CAL-120   | 10000              | 2160            |
| 7  |                | HCC1937   | 10000              | 10000           |
| 8  |                | HCC1954   | 10000              | 10000           |
| 9  |                | MX-1      | 10000              | 7340            |
| 10 |                | SK-BR-3   | 10000              | 760             |
| 11 |                | ZR-75-1   | 10000              | 3050            |
| 12 | Cervix         | HeLa      | 1640               | 350             |
| 13 |                | HeLa 229  | 10000              | 2630            |
| 14 | Colorectum     | COLO 205  | 2340               | 400             |
| 15 |                | DLD-1     | 10000              | 670             |
| 16 |                | HCT-8     | 10000              | 1770            |
| 17 |                | SW1116    | 10000              | 860             |
| 18 |                | SW1417    | 9370               | 680             |
| 19 | Kidney         | 786-O     | 10000              | 3010            |
| 20 |                | OS-RC-2   | 10000              | 10000           |
| 21 |                | UO.31     | 5770               | 480             |
| 22 | Liver          | Hep3B     | 10000              | 890             |
| 23 |                | SNU-182   | 10000              | 5330            |
| 24 |                | SNU-354   | 10000              | 470             |
| 25 |                | SNU-368   | 10000              | 3840            |
| 26 |                | SNU-387   | 10000              | 1430            |
| 27 | Lung           | Hs 618.T  | 10000              | 7620            |
| 28 |                | NCI-H1417 | 3750               | 390             |
| 29 |                | NCI-H1688 | 10000              | 5080            |
| 30 |                | NCI-H1836 | 10000              | 10000           |
| 31 |                | NCI-H1963 | 1070               | 190             |
| 32 |                | NCI-H209  | 10000              | 10000           |
| 33 |                | NCI-H69   | 10000              | 1400            |

|    |          |                    |       |      |
|----|----------|--------------------|-------|------|
| 34 |          | SW1271             | 10000 | 600  |
| 35 | Ovary    | A2780cis           | 1700  | 340  |
| 36 |          | OVCAR-8            | 2300  | 340  |
| 37 |          | SW626              | 10000 | 790  |
| 38 |          | SW756              | 10000 | 830  |
| 39 | Pancreas | CFPAC-1            | 6360  | 570  |
| 40 |          | PL45               | 10000 | 1210 |
| 41 |          | SW1990             | 10000 | 2790 |
| 42 | Prostate | 22Rv1              | 10000 | 610  |
| 43 |          | C4-2               | 2290  | 460  |
| 44 |          | DU 145             | 10000 | 6550 |
| 45 |          | LNCaP clone<br>FGC | 990   | 240  |
| 46 |          | VCAP               | 790   | 170  |
| 47 | Skin     | SK-MEL-28          | 10000 | 3880 |
| 48 |          | SK-MEL-5           | 10000 | 960  |
| 49 | Stomach  | SNU-1              | 1120  | 300  |
| 50 |          | SNU-216            | 10000 | 810  |
| 51 |          | SNU-484            | 10000 | 850  |
| 52 |          | SNU-601            | 10000 | 890  |
| 53 | Blood    | Molt-4             | 2380  | 560  |
| 54 |          | KG-1               | 580   | 110  |
| 55 |          | THP-1              | 1010  | 290  |
| 56 |          | KHYG-1             | 1070  | 180  |
| 57 |          | Daudi              | 1170  | 300  |
| 58 |          | Raji               | 1780  | 320  |
| 59 |          | RL                 | 840   | 130  |
| 60 |          | U-937              | 1110  | 280  |

**Supplementary Table 3. Antiproliferative activity, expressed in nM, obtained in DLBCL cell lines after 72 hours exposure to NEO2734, birabresib (OTX015), SGC-CBP30 and NEO1132.** DLBCL, diffuse large B-cell lymphoma; GCB, germinal center B-cell type; ABC, activated B-cell like. *MYD88*, *BCL2*, *MYC* and *TP53* status were obtained as previously described <sup>2,3</sup>. *CREBBP* and *EP300* status was obtained as described in the methods.

| DLBCL type | Cell line | Neo2734 | Birabresib | Neo1132 | SGC-CBP30 | MYC translocation | MYD88 mutation | BCL2 translocation | p53 inactive | CREBBP | EP300 |
|------------|-----------|---------|------------|---------|-----------|-------------------|----------------|--------------------|--------------|--------|-------|
| ABC        | SUDHL2    | 56.6    | 60.6       | 127.9   | 2670.9    | no                | N.A.           | no                 | no           | 0      | 1     |
| ABC        | TMD8      | 79.9    | 181.5      | 196.5   | 3013.6    | no                | N.A.           | N.A.               | no           | 0      | 0     |
| ABC        | RCK8      | 98.3    | 271.5      | 316.0   | 4157.4    | no                | N.A.           | N.A.               | no           | 0      | 0     |
| ABC        | OCILY10   | 99.3    | 341.2      | 274.4   | 5749.9    | no                | yes            | no                 | yes          | 0      | 0     |
| GCB        | TOLEDO    | 106.0   | 167.0      | 227.2   | 3018.0    | yes               | N.A.           | yes                | yes          | 0      | 1     |
| GCB        | DOHH2     | 107.5   | 120.5      | 292.5   | 4079.9    | yes               | N.A.           | yes                | no           | 0      | 1     |
| GCB        | DB        | 116.4   | 255.8      | 398.5   | 4711.5    | N.A.              | N.A.           | N.A.               | N.A.         | 0      | 1     |
| GCB        | SUDHL10   | 129.4   | 233.7      | 348.3   | 7148.2    | yes               | no             | yes                | yes          | 0      | 1     |
| ABC        | HBL1      | 135.6   | 192.9      | 272.0   | 5619.8    | no                | yes            | N.A.               | yes          | 0      | 0     |
| GCB        | PFEIFFER  | 137.1   | 222.9      | 299.7   | 3405.1    | no                | N.A.           | yes                | yes          | 1      | 1     |
| GCB        | SUDHL6    | 137.6   | 125.3      | 397.4   | 4408.7    | no                | yes            | yes                | yes          | 0      | 1     |
| GCB        | SUDHL16   | 140.8   | 123.8      | 384.8   | 4422.1    | no                | N.A.           | N.A.               | N.A.         | 1      | 1     |
| ABC        | RI1       | 146.9   | 140.4      | 599.2   | 4891.8    | N.A.              | no             | N.A.               | yes          | 1      | 0     |
| GCB        | OCILY1    | 157.0   | 204.0      | 477.3   | 3607.7    | no                | N.A.           | yes                | yes          | 0      | 0     |
| ABC        | OCILY3    | 162.2   | 432.5      | 341.6   | 17135.5   | no                | yes            | no                 | no           | 0      | 0     |
| GCB        | WSUDLCL2  | 167.0   | 442.9      | 377.2   | 8244.1    | no                | no             | yes                | yes          | 0      | 1     |
| ABC        | U2932     | 176.1   | 163.3      | 662.8   | 11027.2   | no                | no             | no                 | yes          | 0      | 0     |
| GCB        | OCILY7    | 207.6   | 392.0      | 621.6   | 10430.7   | yes               | no             | no                 | yes          | 0      | 1     |
| GCB        | SUDHL5    | 213.7   | 278.0      | 551.5   | 3454.9    | no                | no             | no                 | N.A.         | 0      | 1     |
| GCB        | OCILY8    | 224.5   | 164.3      | 648.7   | 15358.0   | yes               | no             | yes                | yes          | 1      | 0     |
| GCB        | SUDHL4    | 231.5   | 405.2      | 596.6   | 11618.9   | no                | no             | yes                | yes          | 0      | 1     |
| GCB        | SUDHL8    | 251.9   | 240.5      | 893.7   | 5447.2    | yes               | no             | no                 | N.A.         | 1      | 1     |
| GCB        | OCILY18   | 257.7   | 171.4      | 579.1   | 3096.4    | yes               | no             | yes                | yes          | 0      | 1     |
| GCB        | KARPAS422 | 328.9   | 404.1      | 806.7   | 7929.2    | no                | N.A.           | yes                | yes          | 1      | 1     |
| GCB        | OCILY19   | 345.9   | 522.7      | 1194.1  | 9586.9    | N.A.              | N.A.           | yes                | no           | 1      | 0     |
| GCB        | VAL       | 644.6   | 495.0      | 1064.8  | 11035.9   | yes               | no             | yes                | no           | 1      | 0     |
| GCB        | FARAGE    | 2462.7  | 16274.5    | 8381.0  | 38441.4   | no                | N.A.           | no                 | yes          | 0      | 1     |

**Supplementary Table 4. Gene set enrichment analysis data.** Cell lines were divided into sensitive and resistant cell lines to NEO2734. Selected gene sets, P value < 0.05 and FDR <0.05.

**Supplementary Table 5. Supervised analysis of RNA-Seq data of DLBCL cell lines exposed to NEO2734.** Data are presented for all the cell lines together, for ABC- or GCB- DLBCL subtypes. In each worksheet: Red, transcripts with log fold change >1 and adjusted P < 0.05; Green, transcripts with log fold change <-1 and adjusted P < 0.05; B) Gene sets significantly enriched after treatment.

**Supplementary Table 6. Supervised analysis of RNA-Seq data of DLBCL cell lines exposed to birabresib (OTX015).** Data are presented for all the cell lines together, for ABC- or GCB- DLBCL subtypes. In each worksheet: Red, transcripts with log fold change >1 and adjusted P < 0.05; Green, transcripts with log fold change <-1 and adjusted P < 0.05; B) Gene sets significantly enriched after treatment.

## References

1. Astorgues-Xerri L, Vazquez R, Odore E, et al. Insights into the cellular pharmacological properties of the BET-inhibitor OTX015/MK-8628 (birabresib), alone and in combination, in leukemia models. *Leuk Lymphoma*. 2019;60(12):3067-3070.
2. Hicks SW, Tarantelli C, Wilhem A, et al. The novel CD19-targeting antibody-drug conjugate huB4-DGN462 shows improved anti-tumor activity compared to SAR3419 in CD19-positive lymphoma and leukemia models. *Haematologica*. 2019;104(8):1633-1639.
3. Spriano F, Chung EYL, Gaudio E, et al. The ETS Inhibitors YK-4-279 and TK-216 Are Novel Antilymphoma Agents. *Clin Cancer Res*. 2019;25(16):5167-5176.
